# Supplementary material for: An N-doped porous carbon network with a multidirectional structure as a highly efficient metal-free catalyst for the oxygen reduction reaction
Source: Royal Society of Chemistry journal article supplement (doi:10.1039/c8nr10242b), 2019-01-01
Supplement: c8nr10242b1.pdf [file c8nr10242b1.pdf]

# Supporting Information

## **N-doped Porous Carbon Network with Multidirectional Structure as Highly Efficient Metal-Free Catalysts for Oxygen Reduction Reaction**

*Hyunsu Han<sup>a,b</sup>, Yuseong Noh<sup>a,b</sup>, Yoongon Kim<sup>c</sup>, Won Suk Jung<sup>a,b</sup>, Seongmin Park<sup>a,b</sup>, and Won  
Bae Kim<sup>a,b\*</sup>*

<sup>a</sup> Department of Chemical Engineering, Pohang University of Science and Technology (POSTECH), 77 Cheongam-ro, Nam-gu, Pohang, Gyeongbuk, 37673, South Korea

<sup>b</sup> Institute for New and Renewable Energy, Pohang University of Science and Technology (POSTECH), 77 Cheongam-ro, Nam-gu, Pohang, Gyeongbuk, 37673, South Korea

<sup>c</sup> School of Materials Science & Engineering, Gwangju Institute of Science and Technology (GIST), 261 Cheomdan-gwagiro, Buk-gu, Gwangju 500-712, South Korea

---

\* Corresponding author  
Tel: 82-54-279-2397  
Fax: 82-54-279-5528  
E-Mail: kimwb@postech.ac.kr

**Table S1.** Textural properties of various N-doped porous carbons.

| Sample           | BET surface area<br>(m <sup>2</sup> g <sup>-1</sup> ) | Microporous area<br>(m <sup>2</sup> g <sup>-1</sup> ) | Total pore volume<br>(cm <sup>3</sup> g <sup>-1</sup> ) | Micropore volume <sup>b</sup><br>(cm <sup>3</sup> g <sup>-1</sup> ) |
|------------------|-------------------------------------------------------|-------------------------------------------------------|---------------------------------------------------------|---------------------------------------------------------------------|
| NPC <sup>a</sup> | 1026.6                                                | 605.6                                                 | 1.046                                                   | 0.648                                                               |
| NPC-800-0.5      | 833.4                                                 | 516.7                                                 | 0.769                                                   | 0.498                                                               |
| NPC-800-1.5      | 637.2                                                 | 407.8                                                 | 0.664                                                   | 0.418                                                               |
| NPC-700-1        | 1211.4                                                | 735.8                                                 | 1.101                                                   | 0.715                                                               |
| NPC-900-1        | 459.3                                                 | 276.8                                                 | 0.513                                                   | 0.308                                                               |

<sup>a</sup> Activation temperature = 800 °C; the weight ratio of KOH/PPyCS = 1

<sup>b</sup> Micropore volume is estimated by t-plot method.

**Table S2.** The chemical compositions of various N-doped porous carbons obtained by XPS.

| Sample           | C (%) | O (%) | N (%) | Graphitic N (%) | Pyridinic N (%) | Oxidized N (%) | Pyrrolic N (%) |
|------------------|-------|-------|-------|-----------------|-----------------|----------------|----------------|
| NPC <sup>a</sup> | 85.5  | 8.1   | 6.4   | 49.1            | 24.0            | 12.1           | 14.8           |
| NPC-800-0.5      | 85.7  | 7.6   | 6.7   | 46.3            | 24.9            | 17.2           | 11.6           |
| NPC-800-1.5      | 85.2  | 9.2   | 5.6   | 54.2            | 22.8            | 8.6            | 14.4           |
| NPC-700-1        | 85.5  | 7.9   | 6.6   | 40.8            | 25.8            | 12.0           | 21.4           |
| NPC-900-1        | 85.5  | 9.3   | 5.2   | 51.1            | 22.1            | 10.9           | 15.9           |

<sup>a</sup> Activation temperature = 800 °C; the weight ratio of KOH/PPyCS = 1

**Table S3.** Comparison of the ORR performances over the N-doped carbon-based catalysts in forms of metal-free N-doped carbons and metal-N-doped carbons in 0.1 M KOH electrolyte.

| Sample                              | Onset potential (V vs RHE) | Half-wave potential (V vs RHE) | Limiting current density <sup>a</sup> (mA cm <sup>-2</sup> ) | Electron transfer number | Stability <sup>c</sup> (test time, sec) | N doping content <sup>b</sup> (at. %) | BET surface area (m <sup>2</sup> g <sup>-1</sup> ) | Synthesis method                 | Ref.      |
|-------------------------------------|----------------------------|--------------------------------|--------------------------------------------------------------|--------------------------|-----------------------------------------|---------------------------------------|----------------------------------------------------|----------------------------------|-----------|
| NPC                                 | 0.94                       | 0.864                          | 5.65                                                         | 4.03                     | 95.2 (50,000)                           | 6.4                                   | 1026                                               | KOH treatment /pyrolysis process | This work |
| NC900                               | 0.83                       | -                              | 4.0                                                          | 3.3                      | -                                       | 2.70                                  | 2747                                               | Pyrolysis process                | S1        |
| NPC-F                               | 0.91                       | 0.84                           | 5.5                                                          | 3.67-3.94                | -                                       | 3.46                                  | 1375                                               | Pyrolysis process                | S2        |
| Carbon nano shell                   | 0.98                       | 0.85                           | 5.1                                                          | 3.7                      | ~93 (50,000)                            | 3.71                                  | 1189                                               | Nano-casting                     | S3        |
| DCN-1000                            | 0.94                       | 0.85                           | 4.21                                                         | 3.72                     | 88.7 (30,000)                           | 8.3                                   | ~ 285                                              | Pyrolysis process                | S4        |
| N-CNFs-800                          | 0.93                       | -                              | 5.7                                                          | 3.7                      | 93.2 (20,000)                           | 6.94                                  | 230                                                | Pyrolysis process                | S5        |
| NCG-1000                            | 0.91 <sup>d</sup>          | 0.737 <sup>d</sup>             | -                                                            | 3.79                     | -                                       | 3.98                                  | -                                                  | Pyrolysis process                | S6        |
| N-GNRs-A                            | 0.91 <sup>d</sup>          | -                              | -                                                            | 3.66-3.92                | ~ 78 (20,000)                           | 2.81                                  | 617                                                | Pyrolysis process                | S7        |
| NGA900                              | 0.914                      | 0.828                          | 4.6                                                          | 3.9                      | 86 (35,000)                             | -                                     | -                                                  | Pyrolysis process                | S8        |
| Fe-N/C-800                          | 0.98                       | -                              | 4.81                                                         | 3.97                     | 93.3 (10,000)                           | 5.79                                  | 934.43                                             | Hydro-thermal /pyrolysis process | S9        |
| CoP-CMP800                          | 0.857 <sup>d</sup>         | 0.797 <sup>d</sup>             | 4.62                                                         | 3.85                     | -                                       | 7.5                                   | ~ 480                                              | Template-free pyrolysis process  | S10       |
| Co <sub>9</sub> S <sub>8</sub> @N-C | 0.89                       | 0.83                           | -                                                            | ~ 4                      | 85 (20,000)                             | 3.45                                  | 110.8                                              | Solvo-thermal process            | S11       |

<sup>a</sup> Limiting current density is recorded at a rotation rate of 1600 rpm.

<sup>b</sup> N content is obtained from XPS spectra.

<sup>c</sup> Value of stability test indicates a relative current (%) obtained from chronoamperometry test.

<sup>d</sup> Conversion of reference electrode into RHE scale was based on the calibration results in this work and a reported paper [S12].

### Reference for Table S3

- [S1] A. Aijaz, N. Fujiwara and Q. Xu, *J. Am. Chem. Soc.*, 2014, **136**, 6790.
- [S2] Z. Xu, X. Zhuang, C. Yang, J. Cao, Z. Yao, Y. Tang, J. Jiang, D. Wu and X. Feng, *Adv. Mater.*, 2016, **28**, 1981.
- [S3] Y. Wang, A. Kong, X. Chen, Q. Lin and P. Feng, *ACS Catal.*, 2015, **5**, 3887.
- [S4] X. Li, J. Kang, Y. Dai, C. Dong, X. Guo and X. Jia, *Adv. Mater. Interfaces*, 2018, **5**, 1800303.
- [S5] R. Li, X. Shao, S. Li, P. Cheng, Z. Hu and D. Yuan, *Nanotechnology*, 2016, **27**, 505402.
- [S6] M. Wang, J. Wang, Y. Hou, D. Shi, D. Wexler, S. D. Poynton, R. C. T. Slade, W. Zhang, H. Liu and J. Chen, *ACS Appl. Mater. Interfaces*, 2015, **7**, 7066.
- [S7] L. Chen, R. Du, J. Zhu, Y. Mao, C. Xue, N. Zhang, Y. Hou, J. Zhang and T. Yi, *Small*, 2015, **11**, 1423.
- [S8] J. Li, Y. Zhang, X. Zhang, J. Han, Y. Wang, L. Gu, Z. Zhang, X. Wang, J. Jian, P. Xu and B. Song, *ACS Appl. Mater. Interfaces*, 2015, **7**, 19626.
- [S9] Ding, L. Li, K. Xiong, Y. Wang, W. Li, Y. Nie, S. Chen, X. Qi and Z. Wei, *J. Am. Chem. Soc.*, 2015, 137, **16**, 5414.
- [S10] Z. S. Wu, L. Chen, J. Liu, K. Parvez, H. Liang, J. Shu, H. Sachdev, R. Graf, X. Feng and K. Müllen, *Adv. Mater.*, 2014, **26**, 1450.
- [S11] Z. Wu, J. Wang, M. Song, G. Zhao, Y. Zhu, G. Fu and X. Liu, *ACS Appl. Mater. Interfaces*, 2018, **10**, 25415.
- [S12] V. Percec, C. H. Ahn, G. Ungar, D. J. P. Yeardley, M. Moller and S. S. Sheiko, *Nature*, 1998, **391**, 161.

**Table S4.** Comparison of the ORR performances over the N-doped carbon-based catalysts in forms of metal-free N-doped carbons and metal-N-doped carbons in acidic condition.

| Sample                        | Onset potential (V vs RHE) | Half-wave potential (V vs RHE) | Limiting current density <sup>a</sup> (mA cm <sup>-2</sup> ) | Electron transfer number | Stability <sup>c</sup> (test time, sec) | N doping content <sup>b</sup> (at. %) | BET surface area (m <sup>2</sup> g <sup>-1</sup> ) | Synthesis method                                  | Ref.      |
|-------------------------------|----------------------------|--------------------------------|--------------------------------------------------------------|--------------------------|-----------------------------------------|---------------------------------------|----------------------------------------------------|---------------------------------------------------|-----------|
| NPC                           | 0.84                       | 0.74                           | 5.3                                                          | 3.93                     | 94.1 (50,000)                           | 6.4                                   | 1026                                               | KOH treatment/pyrolysis process                   | This work |
| NCS-800                       | 0.72                       | 0.4                            | 3.3                                                          | 3.90-3.98                | ~80 (~9,500)                            | 9.1                                   | 646                                                | Hydro-thermal/pyrolysis process                   | S1        |
| CCa                           | 0.76                       | 0.37                           | -                                                            | -                        | -                                       | 9.2                                   | 1350                                               | Pyrolysis process                                 | S2        |
| NPC-1000                      | 0.818                      | 0.698                          | 5.85                                                         | 3.82-3.99                | < 90 (~20,000)                          | 2.08                                  | 811                                                | Pyrolysis process                                 | S3        |
| Co-Zn-ZIF/GO-800 <sup>d</sup> | 0.85                       | -                              | 4.2                                                          | ~ 4                      | 84 (10,800)                             | -                                     | 1170                                               | Crystal growth/pyrolysis process                  | S4        |
| Fe-N/C-800 <sup>d</sup>       | 0.77                       | 0.6                            | 4.88                                                         | 3.95                     | -                                       | 5.79                                  | 934.43                                             | Hydro-thermal/pyrolysis process                   | S5        |
| CPANI-Fe-NaCl <sup>d</sup>    | -                          | ~ 0.727                        | ~ 5                                                          | ~ 3.9                    | -                                       | -                                     | 265.7                                              | Salt crystallization process                      | S6        |
| P-Fe-N-CNFs <sup>d</sup>      | 0.85                       | 0.74                           | 5.5                                                          | 3.99                     | 96 (10,000)                             | 6.23                                  | 941                                                | Multiplex templating process                      | S7        |
| NPMEs <sup>d</sup>            | 0.824                      | 0.748                          | 4.43                                                         | 3.84                     | -                                       | 2.26                                  | 267                                                | Self-assembly/pyrolysis process                   | S8        |
| Fe/SNC                        | -                          | 0.77                           | ~ 4.8                                                        | 3.85                     | 86 (3,000)                              | 5.7                                   | 1032                                               | Template casting process                          | S9        |
| FePPy-900                     | 0.814                      | 0.74                           | 5.7                                                          | 3.5-4.0                  | 87 (~4,200)                             | 4.25                                  | 592.2                                              | Pyrolysis/leaching/stabilization process          | S10       |
| Fe-N-CC                       | 0.8                        | 0.52                           | -                                                            | 3.8                      | -                                       | 5.88                                  | 1590                                               | Vapor deposition polymerization/pyrolysis process | S11       |

<sup>a</sup> Limiting current density is recorded at a rotation rate of 1600 rpm.

<sup>b</sup> N content is obtained from XPS analysis.

<sup>c</sup> Value of stability test indicates a relative current (%) obtained from chronoamperometry test.

<sup>d</sup> Electrolyte is 0.1 M HClO<sub>4</sub> aqueous solution.

#### Reference for Table S4

- [S1] P. Chen, L. K. Wang, G. Wang, M. R. Gao, J. Ge, W. J. Yuan, Y. H. Shen, A. J. Xie and S. H. Yu, *Energy Environ. Sci.*, 2014, **7**, 4095.
- [S2] G. A. Ferrero, A. B. Fuertes, M. Sevilla and M. M. Titirici, *Carbon*, 2016, **106**, 179.
- [S3] L. Ye, G. Chai and Z. Wen, *Adv. Funct. Mater.*, 2017, **27**, 1606190.
- [S4] J. Wei, Y. Hu, Y. Liang, B. Kong, J. Zhang, J. Song, Q. Bao, G. P. Simon, S. P. Jiang and H. Wang, *Adv. Funct. Mater.*, 2015, **25**, 5768.
- [S5] W. Niu, L. Liu, N. Wang, J. Liu, W. Zhou, Z. Tang and S. Chen, *J. Am. Chem. Soc.*, 2015, **137**, 5555.
- [S6] W. Ding, L. Li, K. Xiong, Y. Wang, W. Li, Y. Nie, S. Chen, X. Qi and Z. Wei, *J. Am. Chem. Soc.*, 2015, **137**, 5414.
- [S7] B. C. Hu, Z. Y. Wu, S. Q. Chu, H. W. Zhu, H. W. Liang, J. Zhang and S. H. Yu, *Energy Environ. Sci.*, 2018, **11**, 2208.
- [S8] J. Li, Y. Song, G. Zhang, H. Liu, Y. Wang, S. Sun and X. Guo, *Adv. Funct. Mater.*, 2017, **27**, 1604356.
- [S9] H. Shen, G. E. Eduardo, J. Ma, K. Zang, J. Luo, L. Wang, S. Gao, X. Mamat, G. Hu, T. Wagberg and S. Guo, *Angew. Chem. Int. Ed.*, 2017, **56**, 13800.
- [S10] T. N. Tran, M. Y. Song, K. P. Singh, D. S. Yang and J. S. Yu, *J. Mater. Chem. A*, 2016, **4**, 8645.
- [S11] G. A. Ferrero, K. Preuss, A. Marinovic, A. B. Jorge, N. Mansor, D. J. L. Brett, A. B. Fuertes, M. Sevilla and M. M. Titirici, *ACS Nano*, 2016, **10**, 5922.

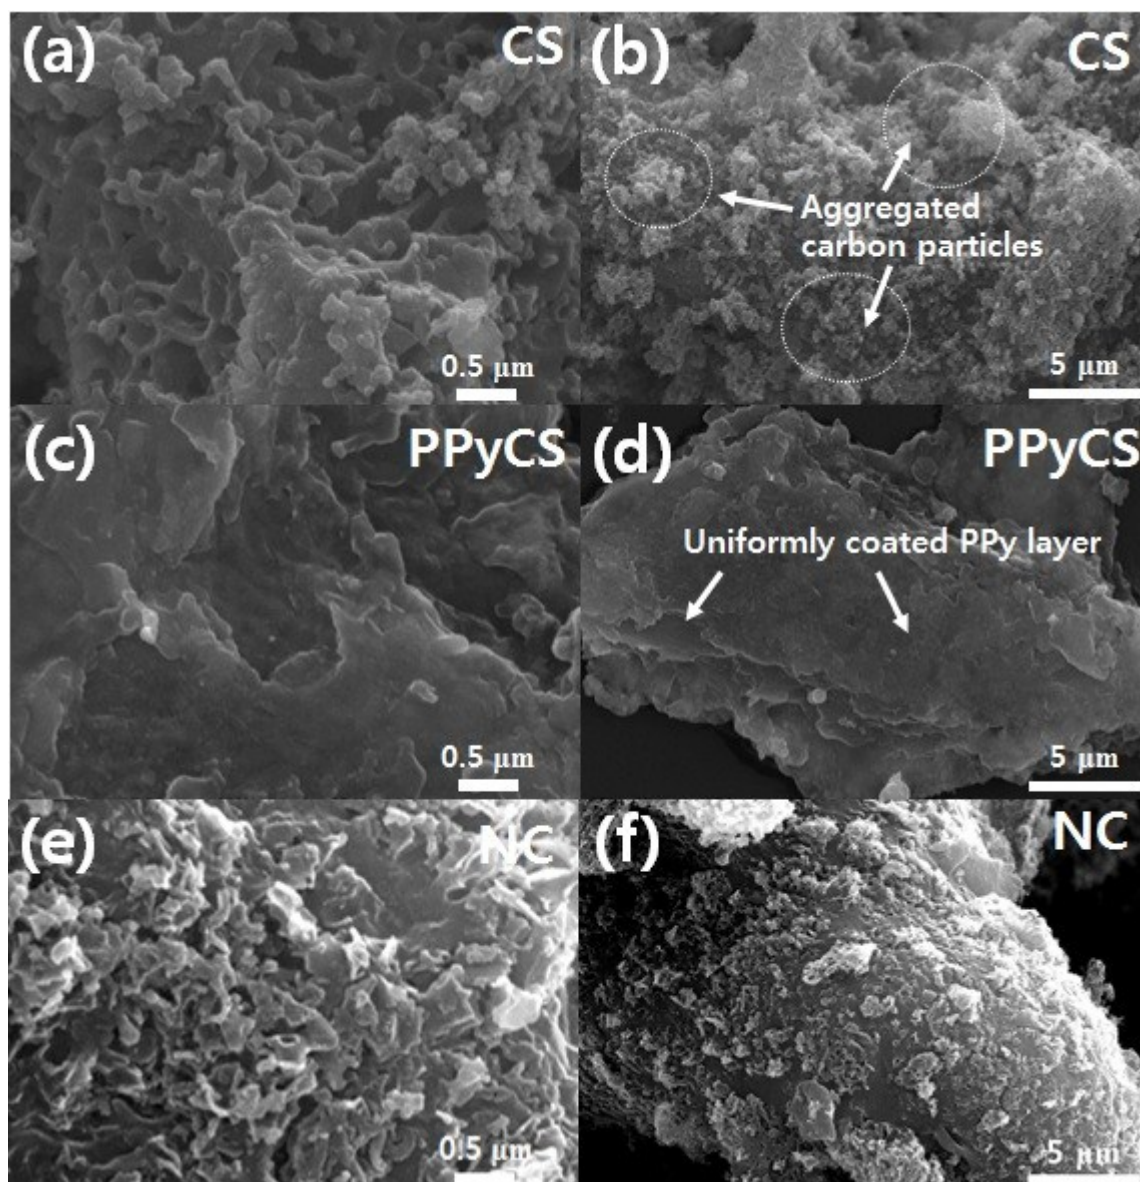

**Fig. S1** SEM images of (a)-(b) CS, (c)-(d) PPyCS and (e)-(f) NC.



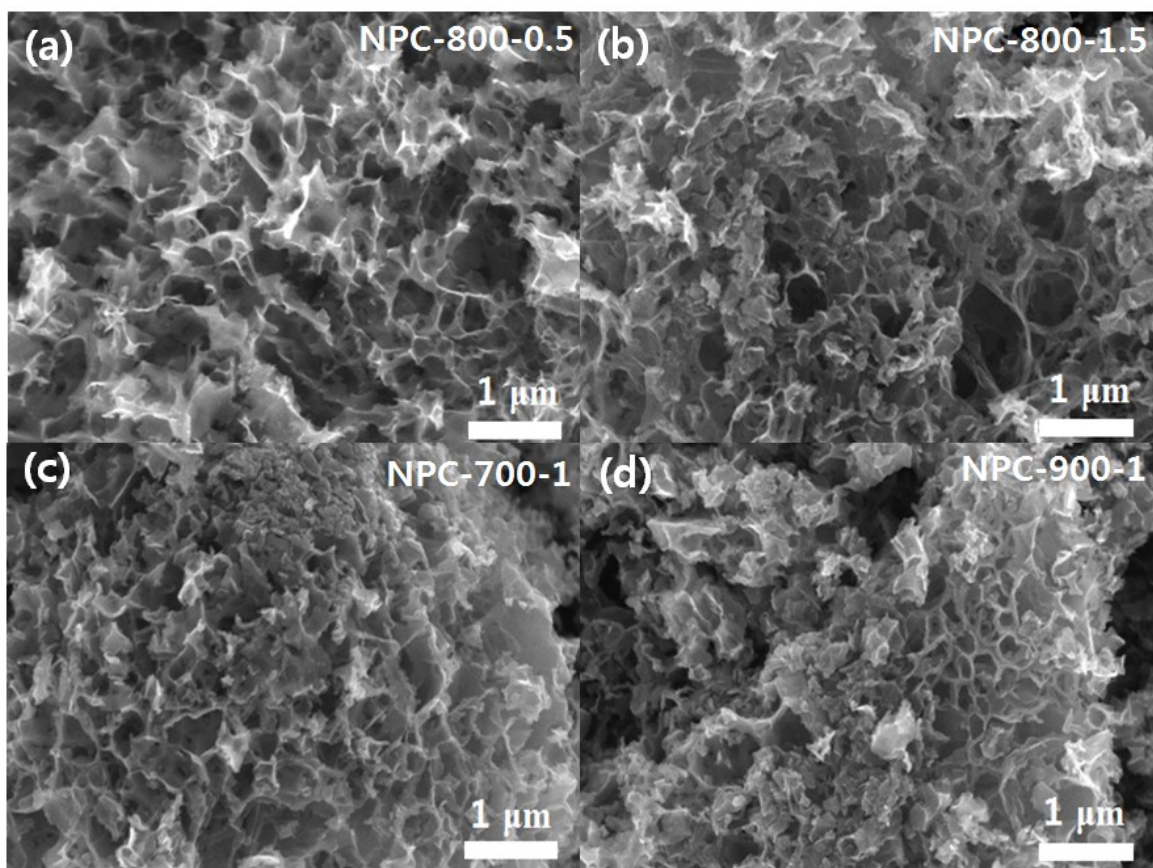

**Fig. S2** SEM images of (a) NPC-800-0.5, (b) NPC-800-1.5, (c) NPC-700-1 and (d) NPC-900-1.

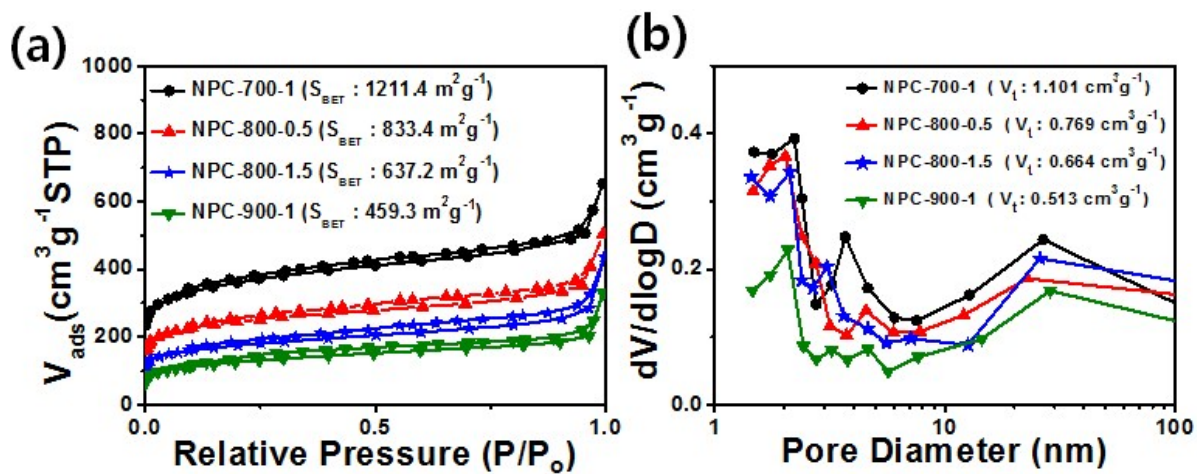

**Fig. S3** (a) N<sub>2</sub> sorption isotherms and (b) the corresponding pore size distributions of various N-doped porous carbons.

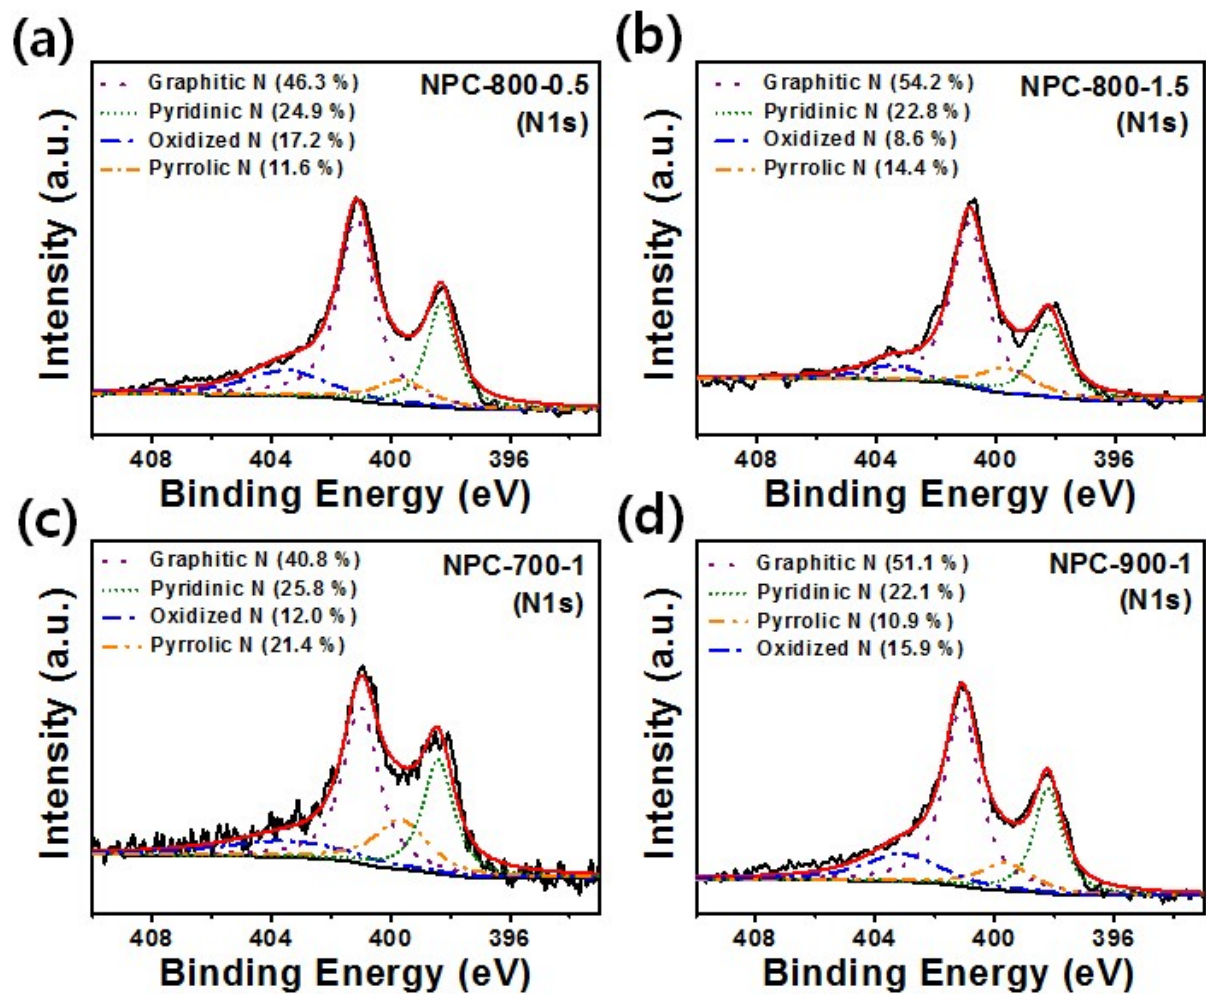

Fig. S4 XPS survey spectra and high resolution N 1s spectra of (a) NPC-800-0.5, (b) NPC-800-1.5, (c) NPC-700-1 and (d) NPC-900-1.

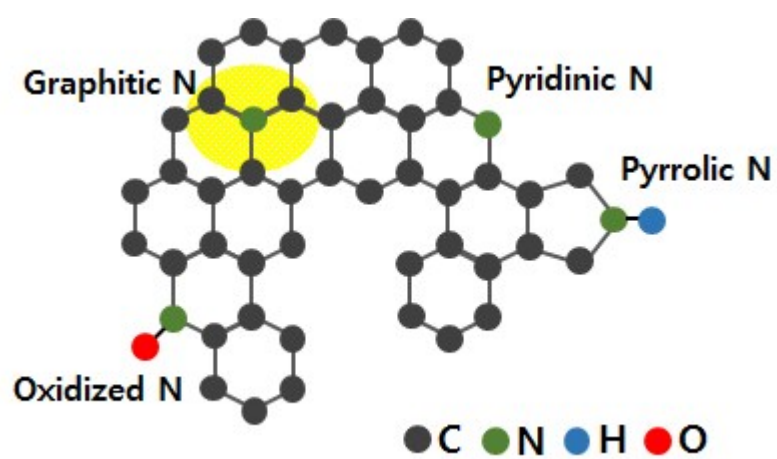

**Fig. S5** Schematic illustration of different bonding configurations in the N doped carbon structure.

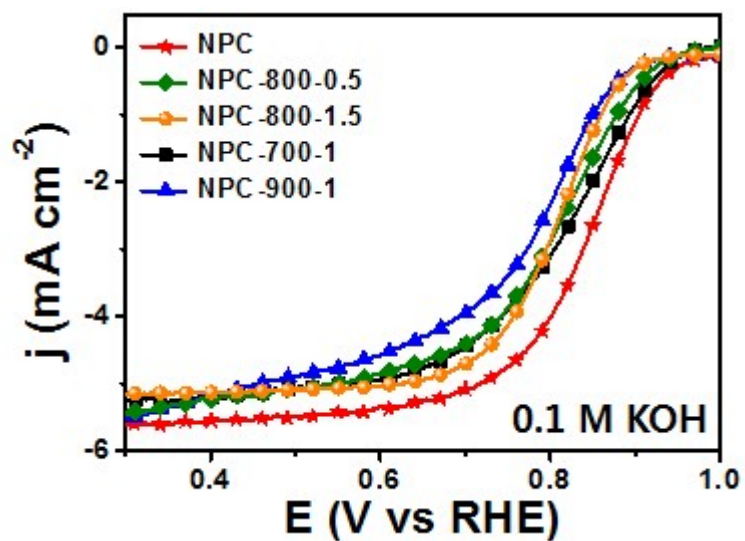

**Fig. S6** ORR polarization curves of various N-doped porous carbons prepared under different activation parameters.

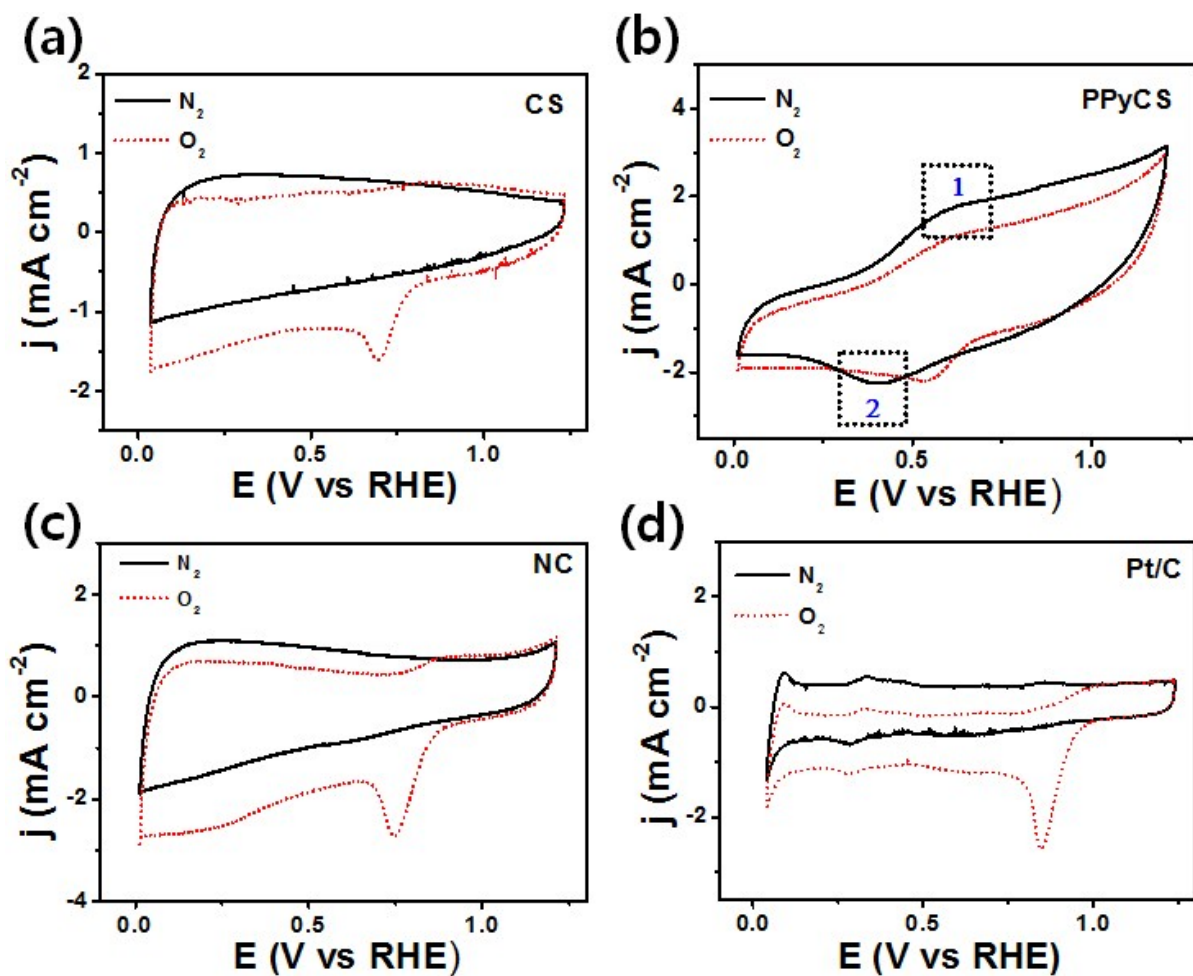

**Fig. S7** CV curves of (a) CS, (b) PPyCS, (c) NC and (d) Pt/C in 0.1 M KOH electrolyte saturated with  $N_2$  or  $O_2$  at a scan rate of  $50 \text{ mV s}^{-1}$ .

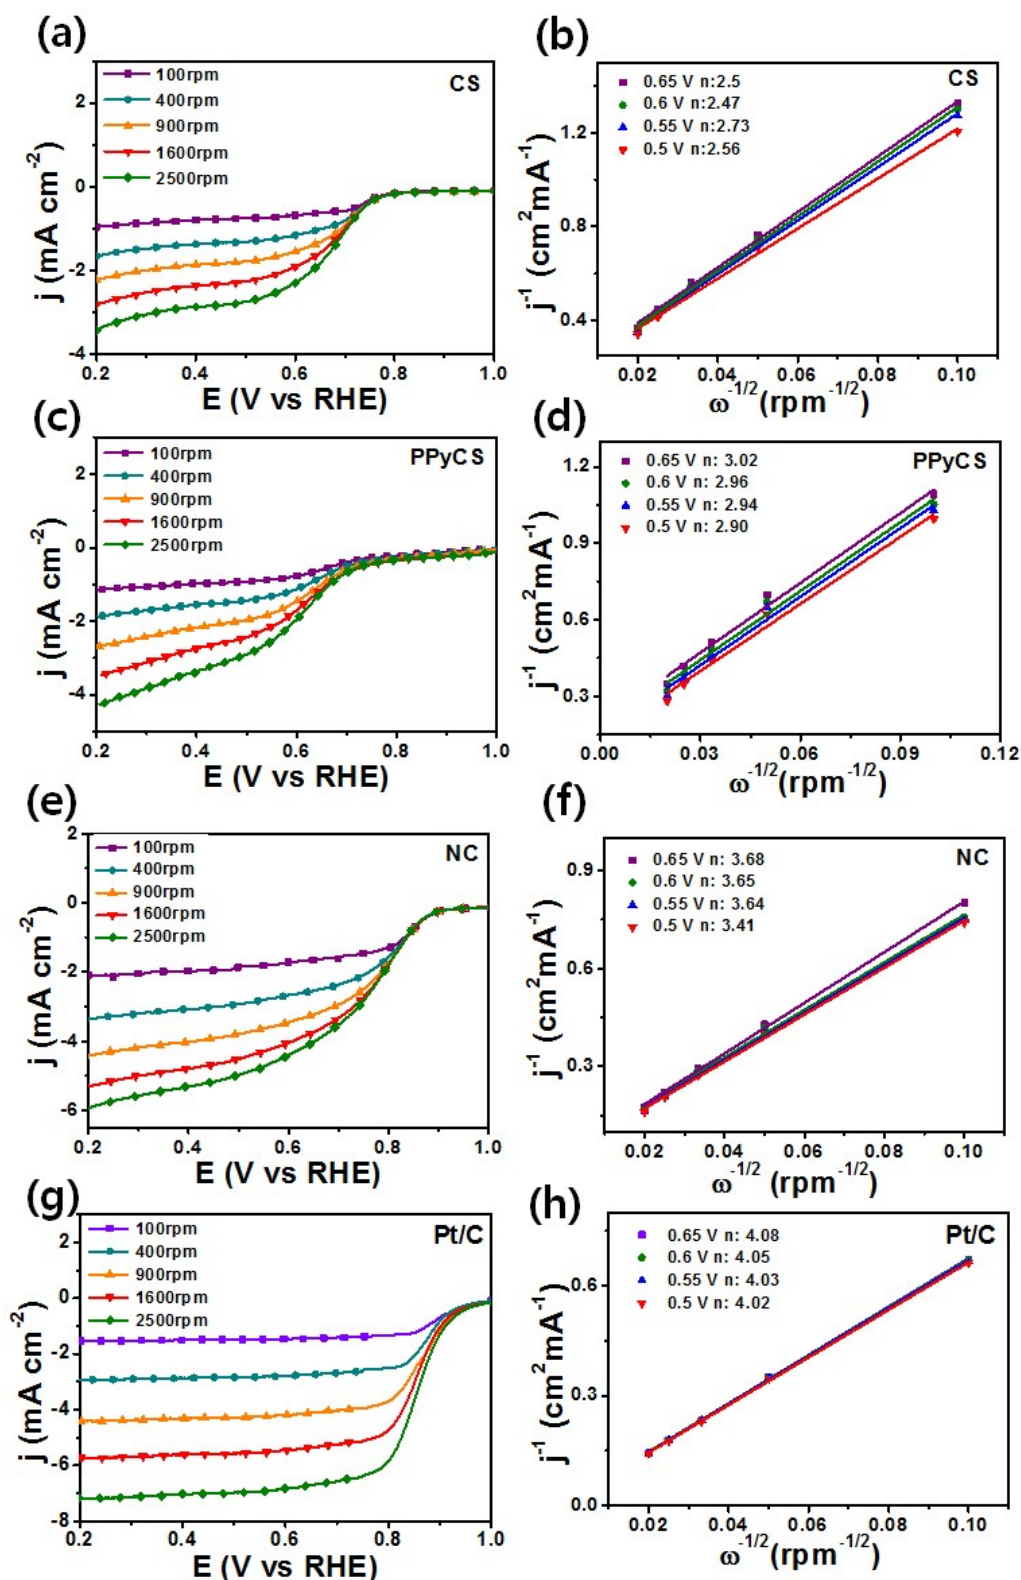

**Fig. S8** ORR polarization curves of (a) CS, (c) PPyCS (e) NC and (g) Pt/C in 0.1 M KOH electrolyte under different rotating rates and the corresponding Koutecky-Levich plots of (b) CS, (d) PPyCS (f) NC and (h) Pt/C at different potentials.

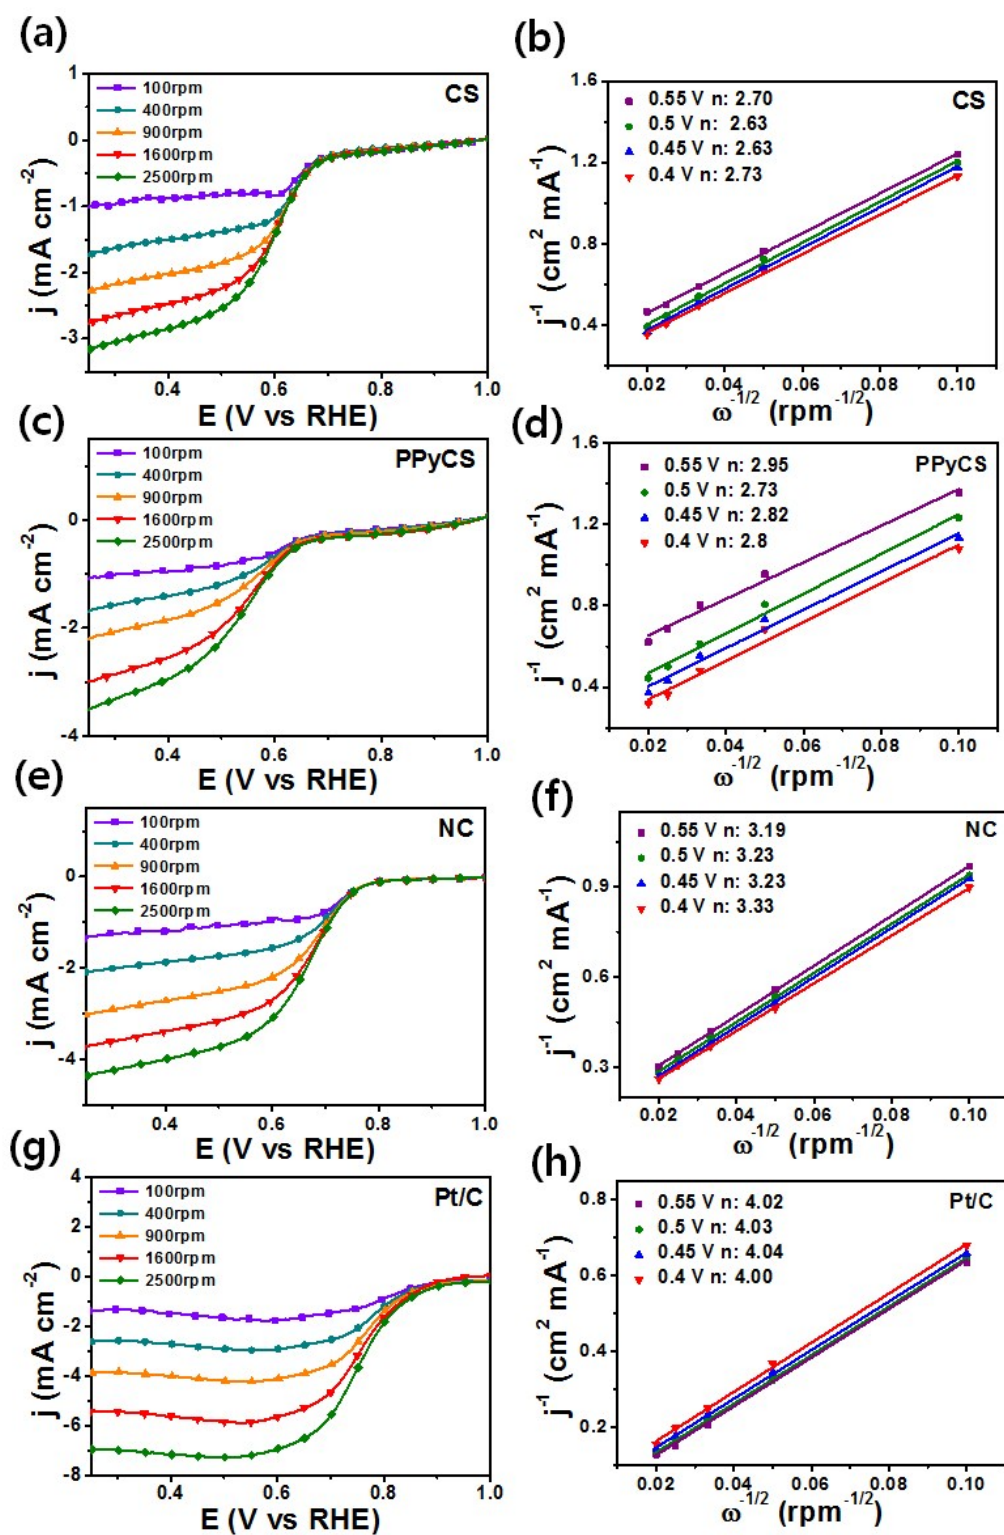

**Fig. S9** ORR polarization curves of (a) CS, (c) PPyCS (e) NC and (g) Pt/C in 0.5 M H<sub>2</sub>SO<sub>4</sub> electrolyte under different rotating rates and the corresponding Koutecky-Levich plots of (b) CS, (d) PPyCS (f) NC and (h) Pt/C at different potentials.



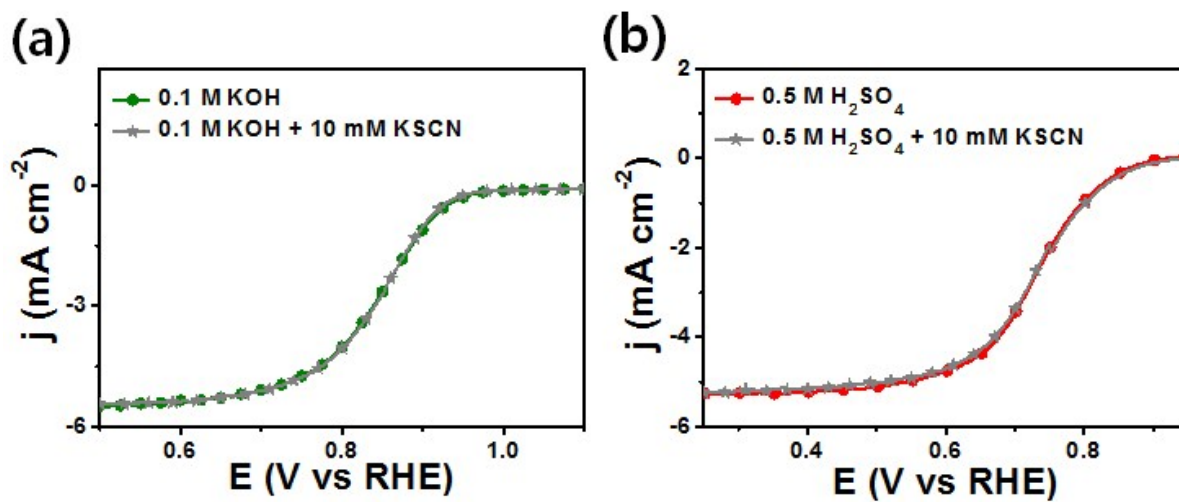

**Fig. S10** ORR polarization curves of NPC in (a) 0.1 M KOH electrolyte (with and without 10 mM KSCN) and (b) 0.5 M H<sub>2</sub>SO<sub>4</sub> electrolyte (with and without 10 mM KSCN) saturated with O<sub>2</sub> at a scan rate of 10 mV s<sup>-1</sup> under 1600 rpm.

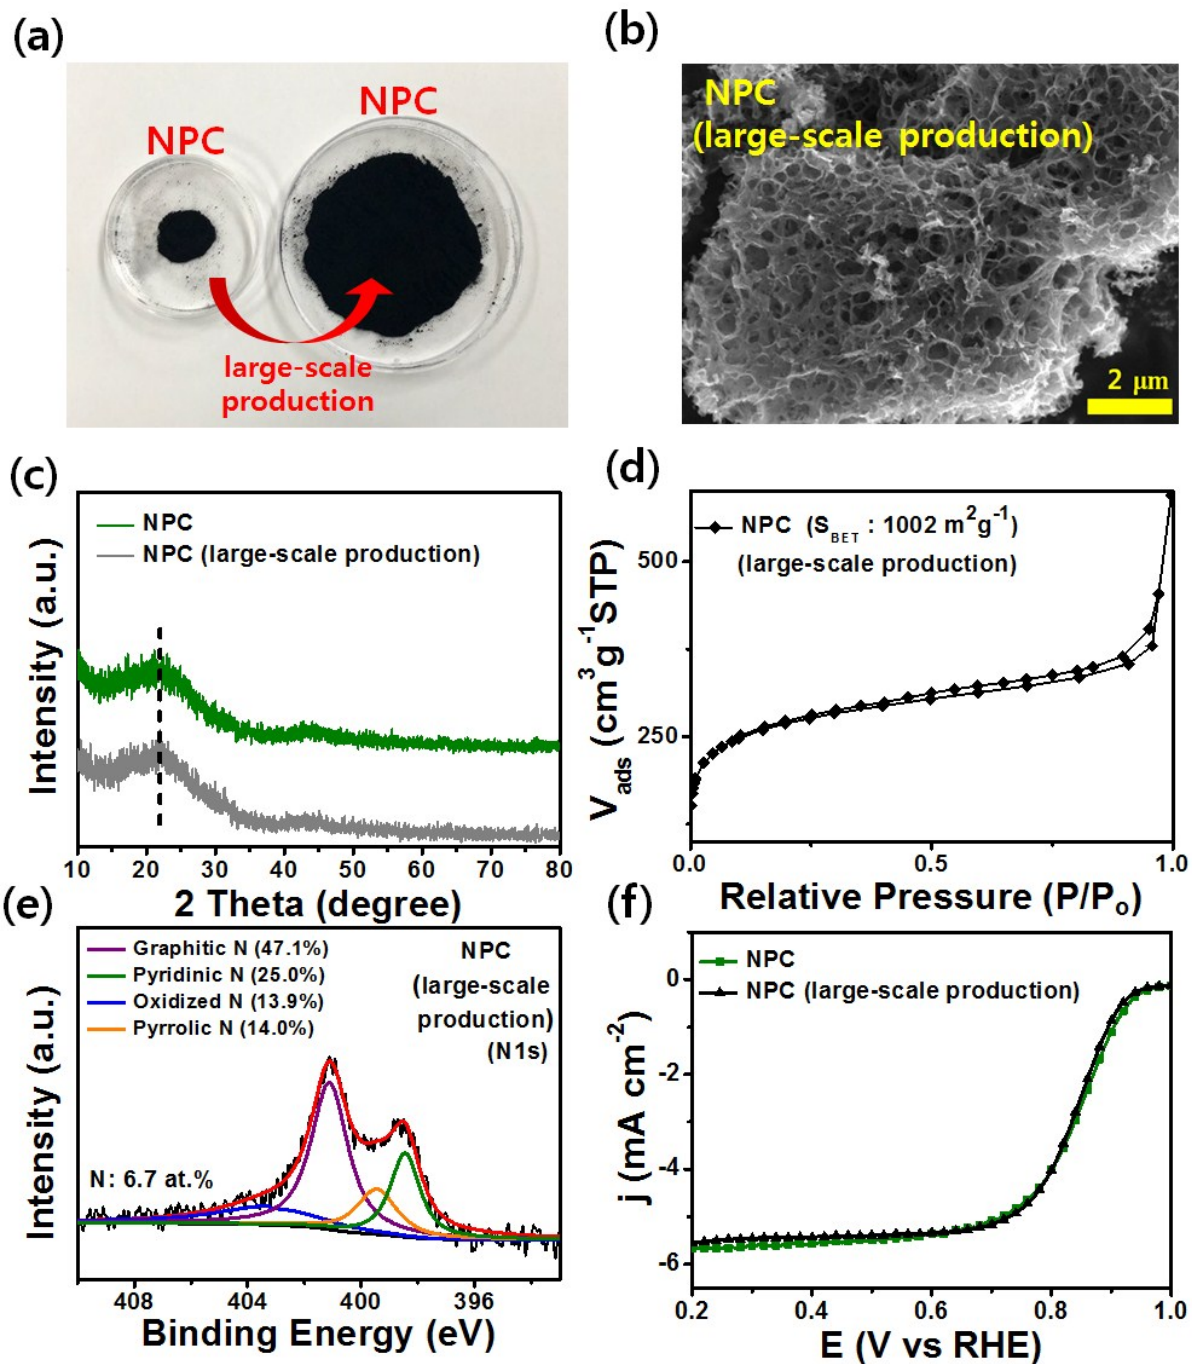

**Fig. S11** (a) Photograph of NPC and NPC (large-scale production), (b) SEM image, (c) XRD patterns, (d) N<sub>2</sub> sorption isotherm, (e) high resolution N 1s spectra and (f) ORR activity of NPC (large-scale production).
